# Supplementary material for: Genetic variation in PTPN1 contributes to metabolic adaptation to high-altitude hypoxia in Tibetan migratory locusts
Source: PubMed Central journal article supplement (PMC6255802; doi:10.1038/s41467-018-07529-8), 2018-11-26
Supplement: 41467_2018_7529_MOESM1_ESM.pdf [file 41467_2018_7529_MOESM1_ESM.pdf]

Supplementary information

**Genetic variation in *PTPNI* contributes to Metabolic Adaptation to  
High-Altitude Hypoxia in Tibetan Migratory Locusts**

Ding et al.

**Supplementary Table 1.** Locust sample information.

| <b>Sample ID</b>  | <b>Locality</b> | <b>Altitudes</b> | <b>Sampling date<br/>(year)</b> |
|-------------------|-----------------|------------------|---------------------------------|
| <b>Tibetan-1</b>  | Maizhikungga    | 4,000 m          | 2005                            |
| <b>Tibetan-2</b>  | Maizhikungga    | 4,000 m          | 2005                            |
| <b>Tibetan-3</b>  | Maizhikungga    | 4,000 m          | 2005                            |
| <b>Tibetan-4</b>  | Lhasa           | 3,700 m          | 2014                            |
| <b>Tibetan-5</b>  | Lhasa           | 3,700 m          | 2014                            |
| <b>Tibetan-6</b>  | Lhasa           | 3,700 m          | 2014                            |
| <b>Tibetan-7</b>  | Lhasa           | 3,700 m          | 2014                            |
| <b>Tibetan-8</b>  | Lhasa           | 3,700 m          | 2014                            |
| <b>Tibetan-9</b>  | Lhasa           | 3,700 m          | 2014                            |
| <b>Tibetan-10</b> | Shannan Nedong  | 4,000 m          | 2015                            |
| <b>Tibetan-11</b> | Doilung Deqing  | 3,700 m          | 2005                            |
| <b>Tibetan-12</b> | Doilung Deqing  | 4,000 m          | 2015                            |
| <b>HaiN-1</b>     | Dongfang        | ≤ 20 m           | 2014                            |
| <b>HaiN-2</b>     | Dongfang        | ≤ 20 m           | 2014                            |
| <b>HaiN-4</b>     | Dongfang        | ≤ 20 m           | 2014                            |
| <b>HaiN-5</b>     | Dongfang        | ≤ 20 m           | 2014                            |
| <b>HaiN-6</b>     | Danzhou         | ≤ 20 m           | 2014                            |
| <b>HaiN-7</b>     | Danzhou         | ≤20 m            | 2014                            |
| <b>HaiN-9</b>     | Danzhou         | ≤ 20 m           | 2014                            |
| <b>HaiN-11</b>    | Danzhou         | ≤ 20 m           | 2014                            |
| <b>HaiN-19</b>    | Danzhou         | ≤ 20 m           | 2014                            |
| <b>HaiN-21</b>    | Danzhou         | ≤ 20 m           | 2014                            |
| <b>TJ</b>         | Dagang          | ≤ 20 m           | 2014                            |
| <b>LN</b>         | Huludao         | ≤ 20 m           | 2014                            |

**Supplementary Table 2.** Summary of whole-genome sequencing data

| <b>Samples</b>    | <b>Mismatch rate</b> | <b>Mapping rate</b> | <b>Average depth</b> | <b>Coverage 1X</b> | <b>Coverage 4X</b> | <b>Coverage 10X</b> |
|-------------------|----------------------|---------------------|----------------------|--------------------|--------------------|---------------------|
| <b>Tibetan-1</b>  | 2.70%                | 96.14%              | 9.74                 | 87.01%             | 71.97%             | 28.98%              |
| <b>Tibetan-2</b>  | 2.61%                | 96.55%              | 12.66                | 87.99%             | 78.08%             | 45.37%              |
| <b>Tibetan-3</b>  | 2.94%                | 95.49%              | 12.31                | 88.37%             | 78.01%             | 45.05%              |
| <b>Tibetan-4</b>  | 2.71%                | 92.79%              | 10.59                | 87.31%             | 73.09%             | 33.83%              |
| <b>Tibetan-5</b>  | 2.73%                | 96.27%              | 10.7                 | 87.03%             | 73.52%             | 35.73%              |
| <b>Tibetan-6</b>  | 2.61%                | 96.18%              | 10.84                | 86.98%             | 73.00%             | 34.74%              |
| <b>Tibetan-7</b>  | 2.64%                | 95.43%              | 10.77                | 87.46%             | 73.56%             | 36.19%              |
| <b>Tibetan-8</b>  | 2.71%                | 96.17%              | 10.97                | 87.67%             | 74.87%             | 37.29%              |
| <b>Tibetan-9</b>  | 2.66%                | 86.12%              | 10.94                | 87.67%             | 75.09%             | 36.81%              |
| <b>Tibetan-10</b> | 2.73%                | 96.09%              | 10.79                | 87.49%             | 75.07%             | 37.10%              |
| <b>Tibetan-11</b> | 2.63%                | 93.31%              | 9.86                 | 87.07%             | 72.01%             | 28.59%              |
| <b>Tibetan-12</b> | 2.57%                | 96.34%              | 10.92                | 87.53%             | 75.01%             | 37.20%              |
| <b>HaiN-1</b>     | 2.78%                | 64.17%              | 10.73                | 87.91%             | 74.75%             | 35.68%              |
| <b>HaiN-2</b>     | 2.94%                | 76.71%              | 10.71                | 87.65%             | 74.45%             | 36.47%              |
| <b>HaiN-4</b>     | 2.78%                | 91.11%              | 10.54                | 87.88%             | 74.45%             | 35.11%              |
| <b>HaiN-5</b>     | 2.81%                | 81.81%              | 10.69                | 87.90%             | 74.83%             | 35.64%              |
| <b>HaiN-6</b>     | 2.75%                | 89.40%              | 10.52                | 88.04%             | 75.70%             | 35.61%              |
| <b>HaiN-7</b>     | 2.72%                | 76.65%              | 10.48                | 87.83%             | 75.12%             | 33.38%              |
| <b>HaiN-9</b>     | 2.90%                | 93.44%              | 10.89                | 87.94%             | 75.89%             | 37.14%              |
| <b>HaiN-11</b>    | 2.76%                | 71.99%              | 10.04                | 87.69%             | 74.04%             | 31.33%              |
| <b>HaiN-19</b>    | 3.06%                | 95.04%              | 12.02                | 88.10%             | 77.76%             | 43.92%              |
| <b>HaiN-21</b>    | 2.76%                | 96.32%              | 10.95                | 87.95%             | 75.23%             | 36.46%              |
| <b>TJ</b>         | 2.44%                | 96.79%              | 13.22                | 89.75%             | 79.15%             | 46.68%              |
| <b>LN</b>         | 2.39%                | 95.93%              | 10.87                | 89.42%             | 78.08%             | 38.41%              |

**Supplementary Table 3.** Gene Ontology (GO) enrichment of positively selected genes

| <b>ID</b>         | <b>Term Type</b> | <b>Description</b>                        | <b><i>n</i></b> | <b><i>P</i> Value</b> |
|-------------------|------------------|-------------------------------------------|-----------------|-----------------------|
| <b>GO:0051186</b> | BP               | Cofactor metabolic process                | 6               | 0.014846              |
| <b>GO:0048869</b> | BP               | Cellular developmental process            | 3               | 0.018246              |
| <b>GO:0051188</b> | BP               | Cofactor biosynthetic process             | 5               | 0.020146              |
| <b>GO:0048856</b> | BP               | Anatomical structure development          | 3               | 0.026556              |
| <b>GO:0009889</b> | BP               | Regulation of biosynthetic process        | 18              | 0.028479              |
| <b>GO:0006733</b> | BP               | Oxidoreduction coenzyme metabolic process | 3               | 0.029702              |
| <b>GO:0008104</b> | BP               | Protein localization                      | 14              | 0.030984              |
| <b>GO:0006732</b> | BP               | Coenzyme metabolic process                | 5               | 0.032354              |
| <b>GO:0009058</b> | BP               | Biosynthetic process                      | 49              | 0.035345              |
| <b>GO:0044767</b> | BP               | Single-organism developmental process     | 3               | 0.03784               |

Note: Only GO terms with more than 2 genes are shown, *n* represents the number of genes and BP represents biological process.

**Supplementary Table 4.** Top 20 genes with the highest  $ZF_{ST}$  value

| <b>Gene ID</b>    | <b>Name</b>    | <b>Description</b>                                                                      | <b><math>ZF_{ST}</math></b> |
|-------------------|----------------|-----------------------------------------------------------------------------------------|-----------------------------|
| <b>LOCMI16039</b> | <i>sdhd-1</i>  | Putative succinate dehydrogenase [ubiquinone] cytochrome b small subunit, mitochondrial | 5.48                        |
| <b>LOCMI09989</b> | <i>USP4</i>    | Ubiquitin carboxyl-terminal hydrolase 4                                                 | 5.16                        |
| <b>LOCMI16005</b> | <i>Fasn2</i>   | Fatty acid synthase                                                                     | 5.16                        |
| <b>LOCMI16361</b> | <i>Ap3d1</i>   | AP-3 complex subunit delta-1                                                            | 5.03                        |
| <b>LOCMI07679</b> | <i>VKR</i>     | Venus kinase receptor                                                                   | 4.92                        |
| <b>LOCMI15451</b> | <i>Osa</i>     | Trithorax group protein osa                                                             | 4.86                        |
| <b>LOCMI07281</b> | <i>Pof</i>     | Protein painting of fourth                                                              | 4.84                        |
| <b>LOCMI13746</b> | <i>If</i>      | Integrin alpha-PS2                                                                      | 4.83                        |
| <b>LOCMI09680</b> | <i>Gas2l1</i>  | GAS2-like protein 1                                                                     | 4.83                        |
| <b>LOCMI06683</b> | <i>rbm26</i>   | RNA-binding protein 26                                                                  | 4.78                        |
| <b>LOCMI16009</b> | <i>Ndufb7</i>  | NADH dehydrogenase [ubiquinone] 1 beta subcomplex subunit 7                             | 4.75                        |
| <b>LOCMI14495</b> | <i>Cul1</i>    | Cullin-1                                                                                | 4.72                        |
| <b>LOCMI16386</b> | <i>Su(dx)</i>  | E3 ubiquitin-protein ligase Su(dx)                                                      | 4.70                        |
| <b>LOCMI07987</b> | <i>Klhdc1</i>  | Kelch domain-containing protein 1                                                       | 4.69                        |
| <b>LOCMI12387</b> | <i>Rbm42</i>   | RNA-binding protein 42                                                                  | 4.68                        |
| <b>LOCMI15987</b> | <i>Fasn1</i>   | Fatty acid synthase                                                                     | 4.63                        |
| <b>LOCMI12038</b> | <i>COL11A2</i> | Collagen alpha-2(XI) chain                                                              | 4.58                        |
| <b>LOCMI04142</b> | <i>Gphn</i>    | Gephyrin                                                                                | 4.58                        |
| <b>LOCMI13542</b> | <i>ZC3H12C</i> | Probable ribonuclease ZC3H12C                                                           | 4.56                        |
| <b>LOCMI05909</b> | <i>FLNA</i>    | Filamin-A                                                                               | 4.68                        |

**Supplementary Table 5.** Top 20 genes with the highest XP-CLR score

| <b>Gene ID</b>    | <b>Name</b>     | <b>Description</b>                                                     | <b>XPCLR</b> |
|-------------------|-----------------|------------------------------------------------------------------------|--------------|
| <b>LOCMI07893</b> | <i>stau2</i>    | Double-stranded RNA-binding protein Staufen homolog 2                  | 129.77       |
| <b>LOCMI13788</b> | <i>CAPRIN1</i>  | Caprin-1                                                               | 124.27       |
| <b>LOCMI08902</b> | <i>MDN1</i>     | Midasin                                                                | 121.69       |
| <b>LOCMI05473</b> | <i>CAP1</i>     | Adenylyl cyclase-associated protein 1                                  | 118.16       |
| <b>LOCMI11968</b> | <i>tamm41</i>   | Mitochondrial translocator assembly and maintenance protein 41 homolog | 113.18       |
| <b>LOCMI10229</b> | <i>ABCG1</i>    | ATP-binding cassette sub-family G member 1                             | 111.66       |
| <b>LOCMI11591</b> | <i>vac14</i>    | VAC14-like protein                                                     | 98.48        |
| <b>LOCMI07509</b> | <i>naprt</i>    | Nicotinate phosphoribosyltransferase                                   | 98.06        |
| <b>LOCMI04670</b> | <i>D1Pas1</i>   | Putative ATP-dependent RNA helicase PI10                               | 96.64        |
| <b>LOCMI10276</b> | <i>WDR74</i>    | WD repeat-containing protein 74                                        | 90.28        |
| <b>LOCMI05539</b> | <i>PTPN1</i>    | Protein-tyrosine phosphatase-1B                                        | 89.60        |
| <b>LOCMI10185</b> | <i>HERC1</i>    | Probable E3 ubiquitin-protein ligase HERC1                             | 88.82        |
| <b>LOCMI17208</b> | <i>proPo-A3</i> | Phenoloxidase subunit A3                                               | 88.35        |
| <b>LOCMI09847</b> | <i>Zdhhc8</i>   | Probable palmitoyltransferase ZDHHC8                                   | 87.93        |
| <b>LOCMI15739</b> | <i>GRIK3</i>    | Glutamate receptor ionotropic, kainate 3                               | 87.84        |
| <b>LOCMI13580</b> | <i>Ctdspl2</i>  | CTD small phosphatase-like protein 2                                   | 87.67        |
| <b>LOCMI15789</b> | <i>Taldo1</i>   | Transaldolase                                                          | 86.25        |
| <b>LOCMI14383</b> | <i>Efhc1</i>    | EF-hand domain-containing protein 1                                    | 85.66        |
| <b>LOCMI13361</b> | <i>SLC18B1</i>  | MFS-type transporter SLC18B1                                           | 84.76        |
| <b>LOCMI10336</b> | <i>Stathmin</i> | Stathmin                                                               | 82.87        |

**Supplementary Table 6.** Top 20 genes with the highest  $\Delta ZHp$  ( $ZHp_{\text{Lowland}} - ZHp_{\text{Tibetan}}$ ) value

| Gene ID    | Name            | Description                                                                  | $\Delta ZHp$ |
|------------|-----------------|------------------------------------------------------------------------------|--------------|
| LOCMI14887 | <i>Znf235</i>   | Zinc finger protein 235                                                      | 8.59         |
| LOCMI14890 | <i>FAM103A1</i> | RNMT-activating mini protein                                                 | 8.12         |
| LOCMI07893 | <i>stau2</i>    | Double-stranded RNA-binding protein Staufen homolog 2                        | 7.76         |
| LOCMI09930 | <i>DNAH3</i>    | Dynein heavy chain 3, axonemal                                               | 7.69         |
| LOCMI06546 | <i>Osbpl1a</i>  | Oxysterol-binding protein-related protein 1                                  | 7.63         |
| LOCMI06820 | <i>DNAH3</i>    | Dynein heavy chain 3, axonemal                                               | 7.45         |
| LOCMI09748 | <i>CLCC1</i>    | Chloride channel CLIC-like protein 1                                         | 7.14         |
| LOCMI05473 | <i>CAP1</i>     | Adenylyl cyclase-associated protein 1                                        | 7.09         |
| LOCMI06460 | <i>Xpnpep3</i>  | Probable Xaa-Pro aminopeptidase 3                                            | 7.00         |
| LOCMI11179 | <i>RPUSD1</i>   | RNA pseudouridylate synthase domain-containing protein 1                     | 6.95         |
| LOCMI14781 | <i>Rnf157</i>   | RING finger protein 157                                                      | 6.94         |
| LOCMI08902 | <i>MDN1</i>     | Midasin                                                                      | 6.85         |
| LOCMI13561 | <i>CHD1</i>     | Chromodomain-helicase-DNA-binding protein 1                                  | 6.81         |
| LOCMI17242 | <i>Adck1</i>    | Uncharacterized aarF domain-containing protein kinase 1                      | 6.76         |
| LOCMI07155 | <i>Aggf1</i>    | Angiogenic factor with G patch and FHA domains 1                             | 6.69         |
| LOCMI09680 | <i>Gas2l1</i>   | GAS2-like protein 1                                                          | 6.66         |
| LOCMI13361 | <i>SLC18B1</i>  | MFS-type transporter SLC18B1                                                 | 6.66         |
| LOCMI13651 | <i>FAM120B</i>  | Constitutive coactivator of peroxisome proliferator-activated receptor gamma | 6.60         |
| LOCMI06948 | <i>Rpp40</i>    | Ribonuclease P, Rpp40                                                        | 6.58         |
| LOCMI04195 | <i>ilvbl</i>    | Acetolactate synthase-like protein                                           | 6.49         |

**Supplementary Table 7.** Nonsynonymous mutations of PSGs involved in energy metabolism

| Gene           | Nonsynonymous mutations                                                        |
|----------------|--------------------------------------------------------------------------------|
| <i>PTPN1</i>   | p.Asn349Ile (c.1046A>T)                                                        |
| <i>FAS1</i>    | p.Met1242Leu (c.3724A>T)<br>p.Ala675Gly (c.2024C>G)<br>p.Lys664Arg (c.1991A>G) |
| <i>FAS2</i>    | non                                                                            |
| <i>FAS3</i>    | p.Ser508Gly (c.1522A>G)<br>p.Ala537Pro (c.1609G>C)<br>p.Gln699Arg (c.2096A>G)  |
| <i>Ndufb7</i>  | non                                                                            |
| <i>PIK3CD</i>  | non                                                                            |
| <i>ADIPOR1</i> | non                                                                            |
| <i>FAR1</i>    | non                                                                            |
| <i>PPT1</i>    | p.Ile13Met (c.39A>G)                                                           |
| <i>ACO1</i>    | non                                                                            |
| <i>SDHD1</i>   | non                                                                            |
| <i>ATPIA2</i>  | p.Ser137Ala (c.409T>G)                                                         |
| <i>VLCAD</i>   | non                                                                            |

Note: Only nonsynonymous mutations with  $F_{ST} > 0.5$  are shown.



**Supplementary Table 8.** Primers used in this study

| Primer name | Sequence, 5'-3'                         | Description                    |
|-------------|-----------------------------------------|--------------------------------|
| PTP1BF      | ATGAGCAGGACTCCTGGTAA                    | Clone the full length of PTP1B |
| PTP1BR      | TCAAACACGGTTAGAGAAGTA                   |                                |
| PTP1BT7F    | TAATACGACTCACTATAGGTATACTACATGGCCTGACTT | <i>PTPN1</i> dsRNA             |
| PTP1BT7R    | TAATACGACTCACTATAGGTCTGCAGAGACCTCAGGTTC |                                |
| PTP1BexF1   | TATCGAATTCATGAGCAGGACTCCTGGTAA          | Overexpression                 |
| PTP1BexR1   | TATCAAGCTTTCAAACACGGTTAGAGAAGTA         |                                |
| PTP1BexF2   | TATCGAATTCGCCATGGGCAGGACTCCTGGTAA       |                                |
| PTP1BexR2   | TATCGCGGCCGCCAACACGGTTAGAGAAGTAAC       |                                |
| PTP1BrtF    | AGCCAACAAACCACTCCCTG                    | qPCR                           |
| PTP1BrtR    | TCATCATCACCTGCTTCCTTA                   |                                |
| IlprtF      | ATGGACTGACCAGCCCCTAA                    |                                |
| IlprtR      | CGGCTCCATCTCCTAAAACAAA                  |                                |
| ACA rtF     | TGATTTATCTGTCTGGCTCCTA                  |                                |
| ACA rtR     | GAGACCTGCAATATGGTATGA                   |                                |
| ACC rtF     | CATTGCCGAGCATTTCATCGTG                  |                                |
| ACC rtR     | GGCCGTAATTGAGTCAACAGG                   |                                |
| PDH E3rtF   | TGGAATGTGATGTCCTGCTCG                   |                                |
| PDH E3rtR   | CCTCATCTTCAGCTTTGTGGG                   |                                |
| ETIF rtF    | ACCATATCAAAGCAGCAAGCG                   |                                |
| ETIF rtR    | TTAATCAACCAACGTCCACCC                   |                                |
| GYS rtF     | TGCATTCTGATATCCCTACC                    |                                |
| GYS rtR     | AATCTCATAATCCGCTTTCC                    |                                |
| PDHE1brtF   | GATTCTCCAGTTATCCGTGTCA                  |                                |
| PDHE1brtR   | TCGCTCTGCTCACTTCCTCA                    |                                |
| PYKrtF      | CAGGCATGAATGTAGCGAGGTT                  |                                |
| PYKrtR      | CCCTTCAAGTAGCCCTGTCTT                   |                                |
| RPS6rtF     | AGGCGAGATGGTGAAAGAAAAG                  |                                |
| RPS6rtR     | AAACGACGAGGAATCGTATTG                   |                                |
| Ald1rtF     | ACTCAGGGACTCGACGACTTG                   |                                |
| Ald1rtR     | GCGTGCCAGAACATTAGCATT                   |                                |
| Ald2rtF     | TGCTGGGATTGCTTTTCCTTTC                  |                                |
| Ald2rtR     | CTCGCTTCTTAAACTCCTCTTGG                 |                                |
| HexrtF      | GGCCTTAATCATGCAACAGAC                   |                                |
| HexrtR      | AGCCATCAATGCCCACTGTAA                   |                                |
| PTIrtF      | GGCGGGCCTTTCGATTATT                     |                                |
| PTIrtR      | GGCTCCAGTCCGTTATCTTGT                   |                                |

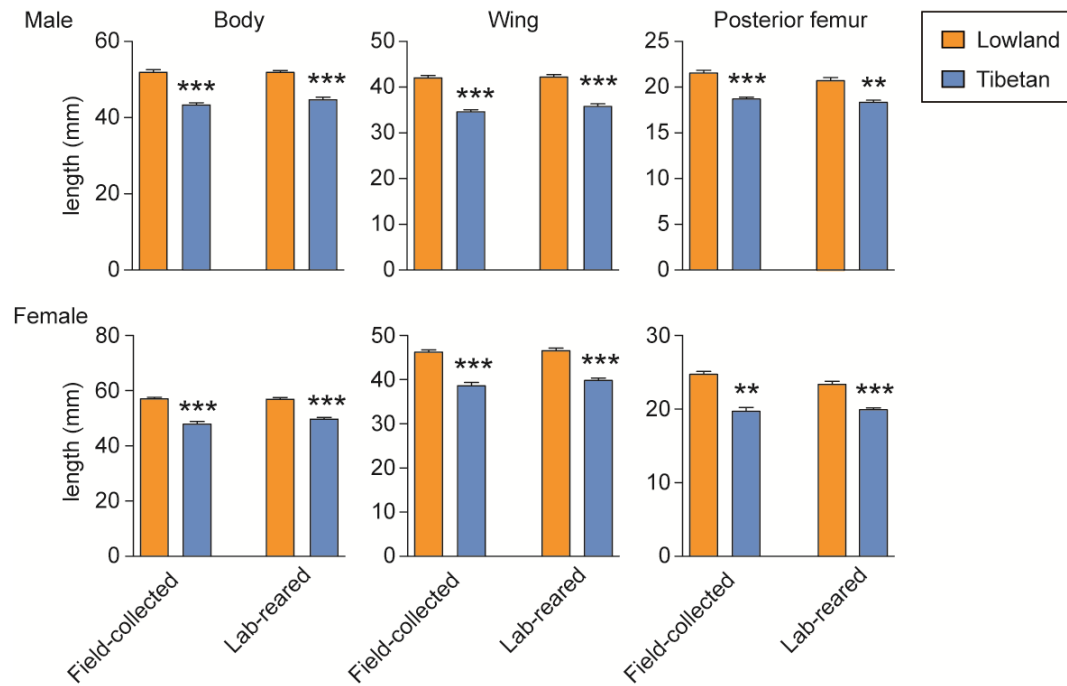

**Supplementary Figure 1.** Difference in body size between the Tibetan and lowland locusts. *Field-collected* represents sexually mature adults newly collected from the field. *Lab-reared* represents sexually mature adults that had been reared in laboratory under normoxic condition for two generations. Measurements are shown as mean  $\pm$  standard error (s.e.m.). \*\* $P < 0.01$ , \*\*\* $P < 0.001$  (Student's *t*-test). These samples are selected randomly from stock locust populations. Sample size:  $n \geq 8$  individuals.

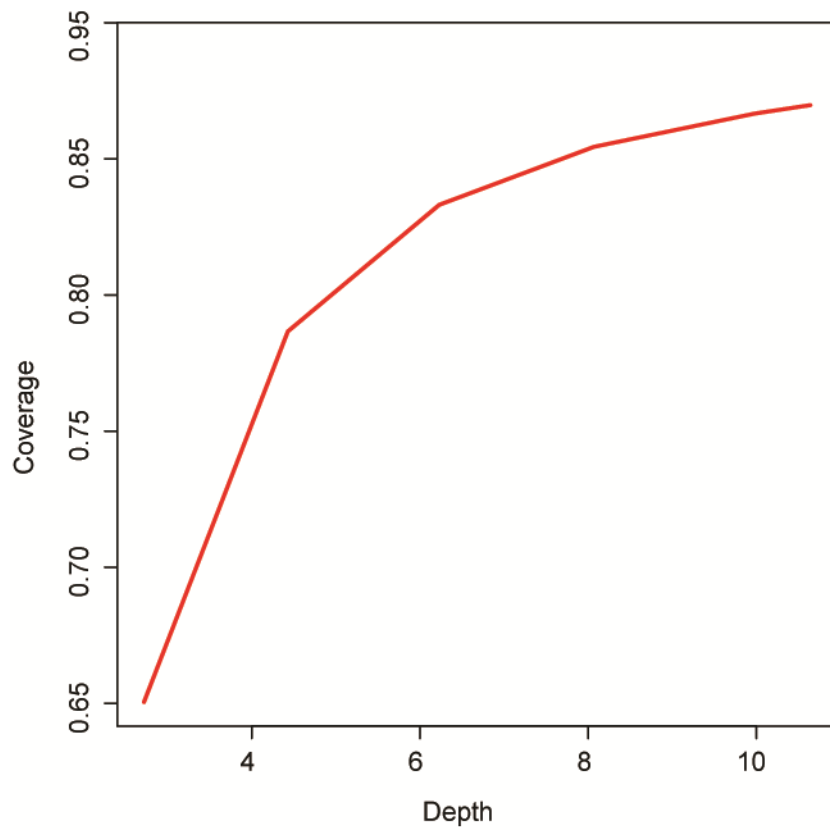

**Supplementary Figure 2.** Saturation curve of coverage rate and sequencing depth based on the whole-genome sequence data of a Tibetan locust.

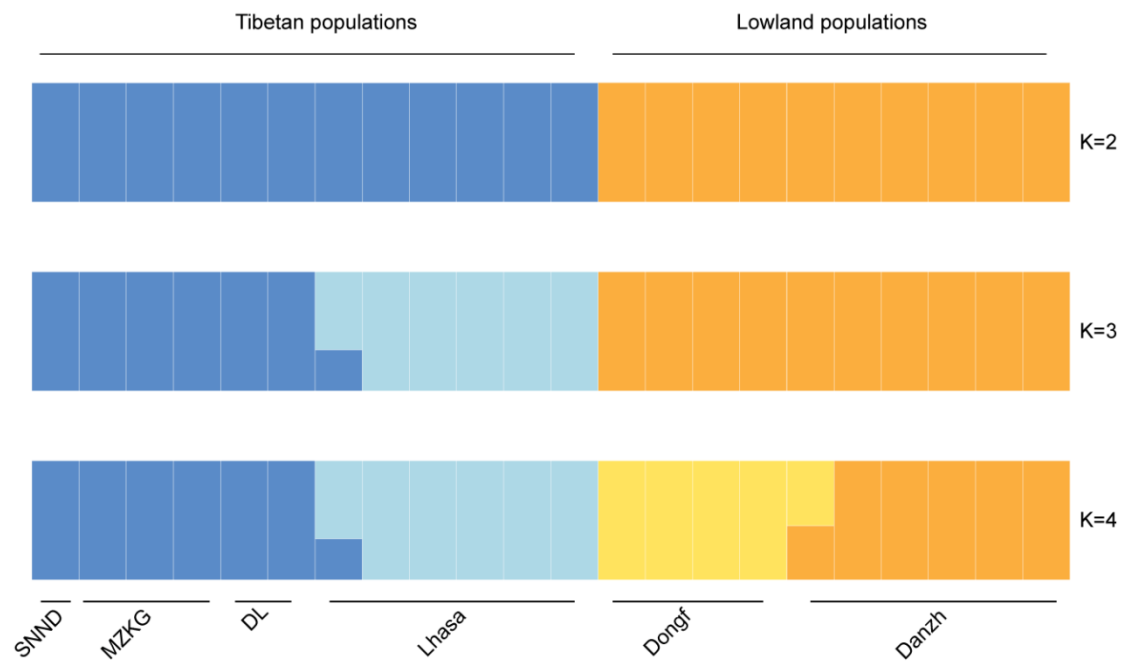

**Supplementary Figure 3.** Genetic structure analysis of Tibetan and lowland locusts from K = 2–4.

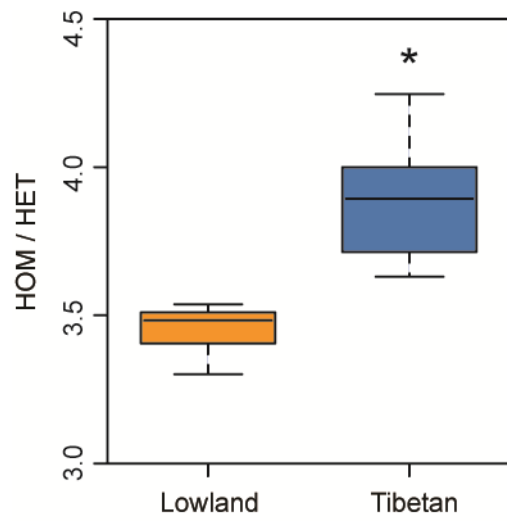

**Supplementary Figure 4.** Heterozygosity across populations. Shown is estimated ratio of homozygous SNPs (HOM) to heterozygous SNPs (HET) /individual. \*  $P < 0.05$  (Student's  $t$ -test). The center line of boxplots represents median value, the bounds of the box represents 75th and 25th percentile and the whiskers represent maximum and minimum value.

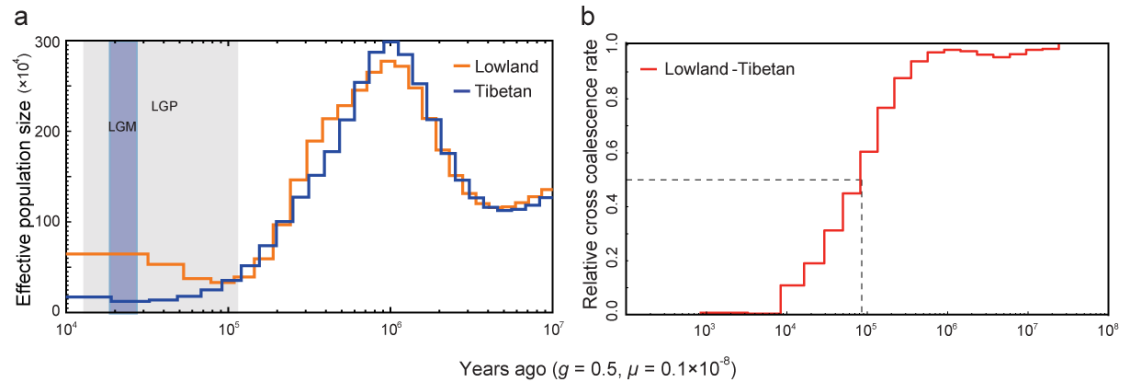

**Supplementary Figure 5.** Demographic histories of the locusts. (a) Effective population size of the Tibetan and lowland locust. LGM represents the last glacial maximum, LGP represents the last glacial period. (b) Relative cross coalescence rates between Tibetan and lowland locusts.  $g$ , generation time;  $\mu$ , neutral mutation rate per generation.

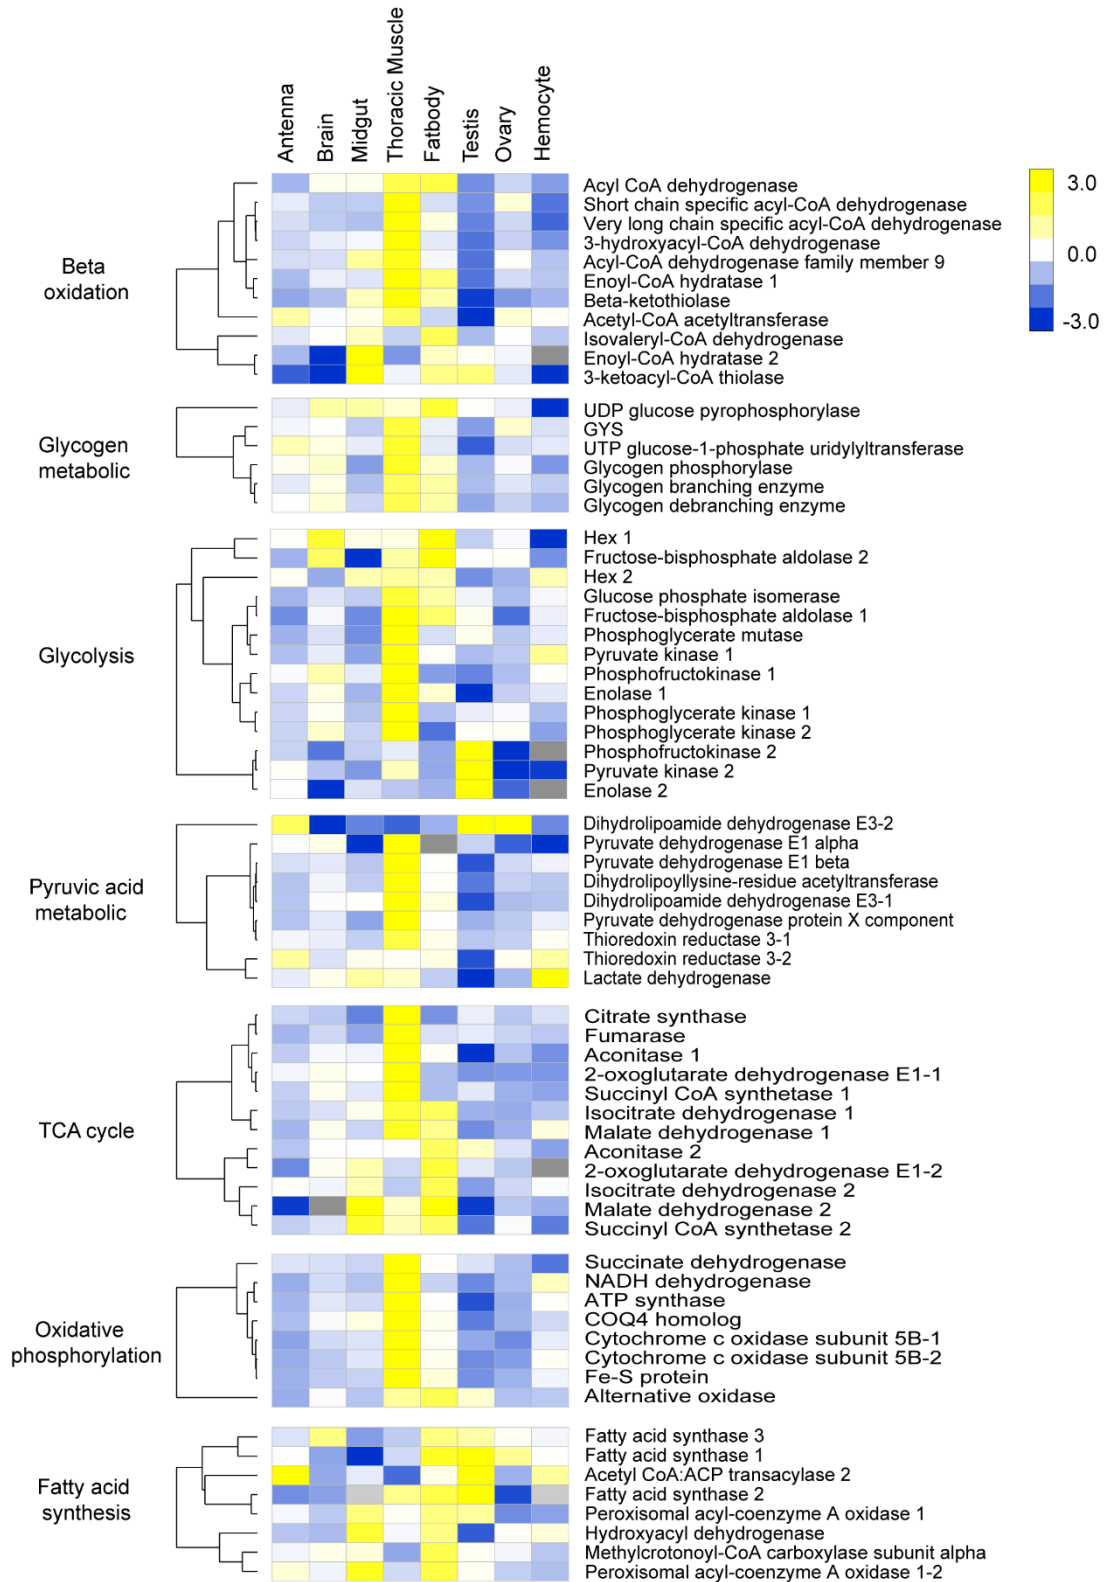

**Supplementary Figure 6.** Expression of metabolism-related genes in different tissues. Heat map signal indicates log<sub>2</sub> fold-change values relative to the mean expression level within each group. Yellow signal represents higher expression and blue represents lower expression relative to the mean expression level within the group. Expression levels were measured through transcriptome sequencing.

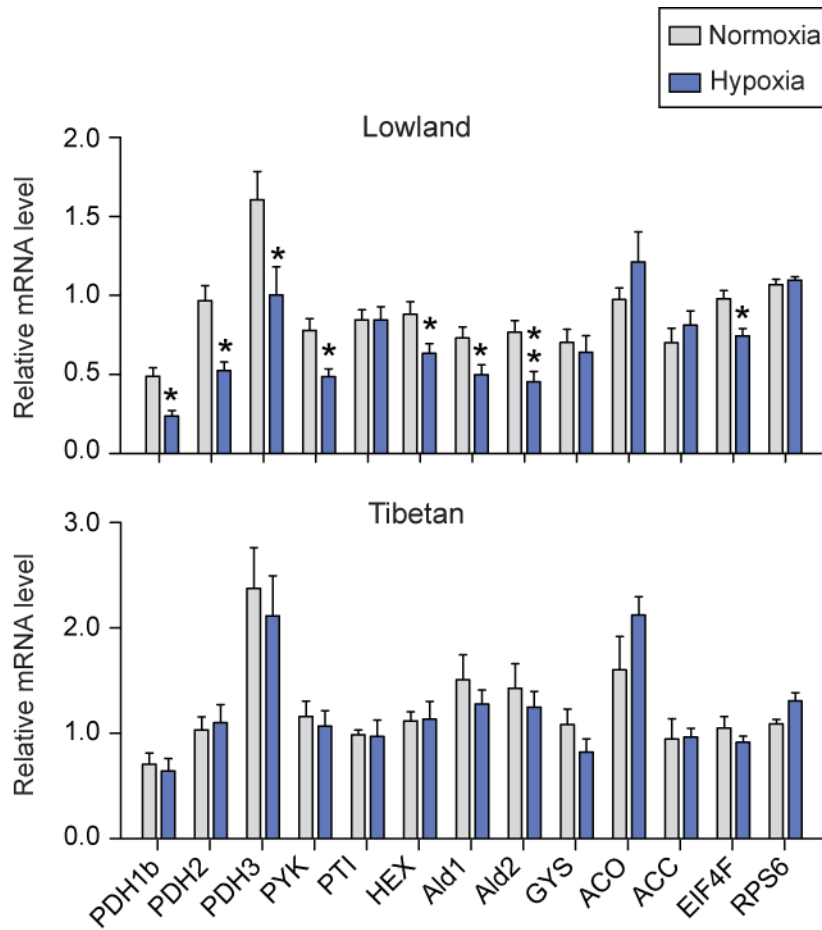

**Supplementary Figure 7** Expression levels of metabolism-related genes in response to hypoxia. These genes are involved in glycolysis, pyruvic acid metabolism, fatty-acid synthesis and protein synthesis. mRNA level was measured by quantitative real-time PCR and normalized against that of the internal control *rp49*. The values are expressed in mean  $\pm$  s.e.m. \*  $P < 0.05$ , \*\*  $P < 0.01$  (Student's *t*-test) compared to control (i.e., normoxia) ( $n = 5$  replicates).



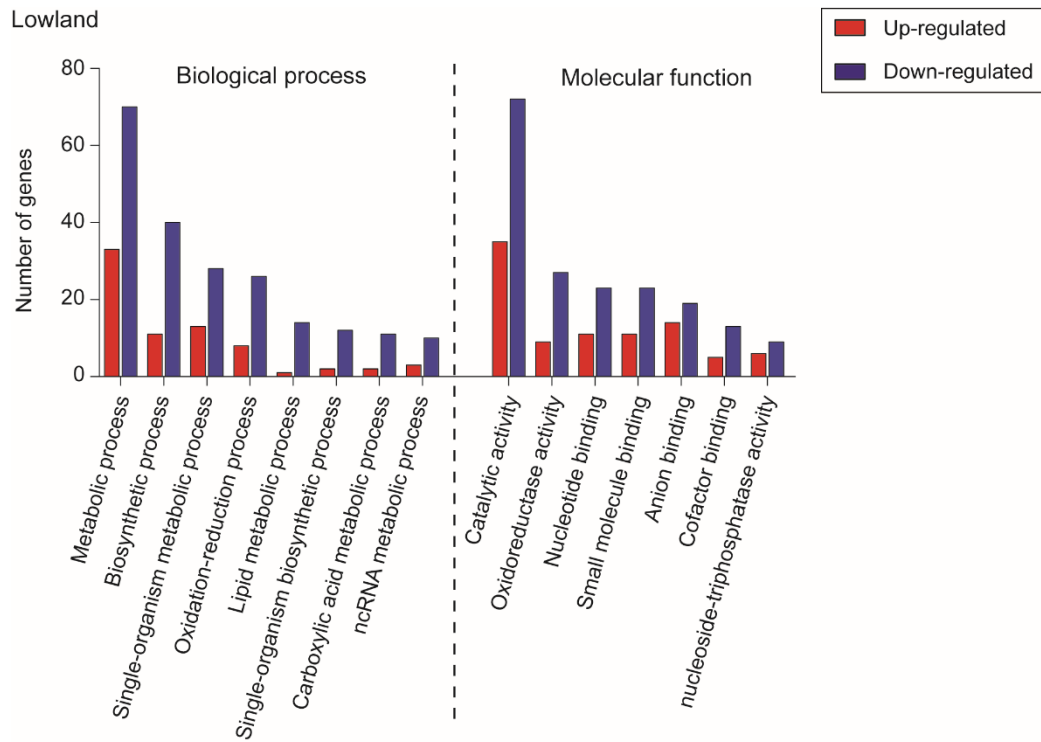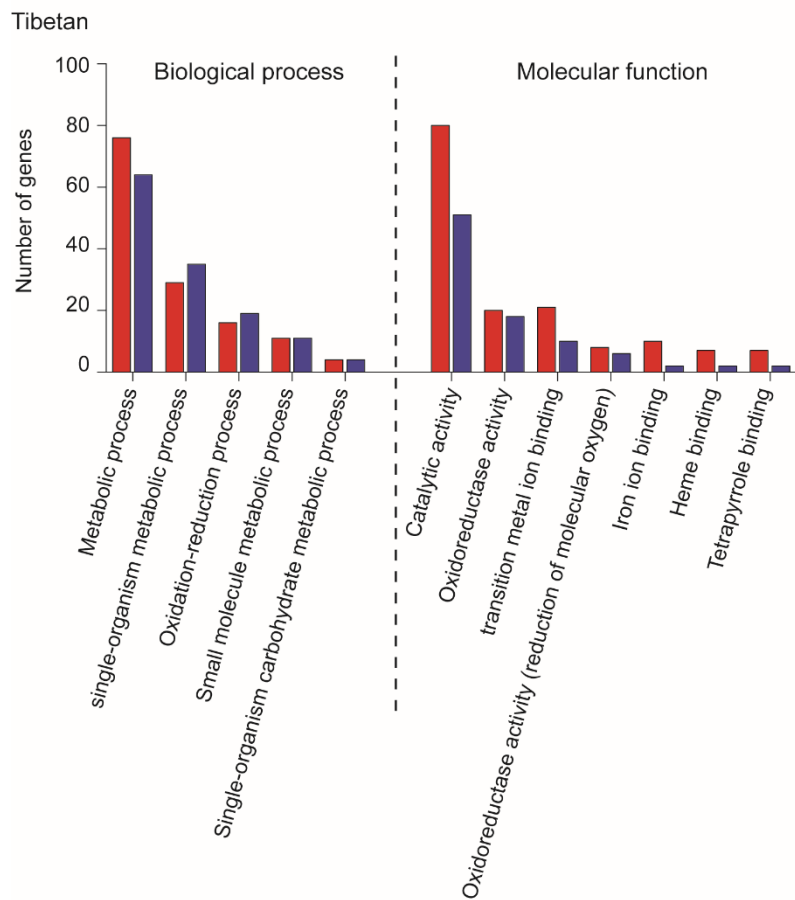

**Supplementary Figure 8.** GO enrichment of differentially expressed genes in response to hypoxia exposure of locust adults.

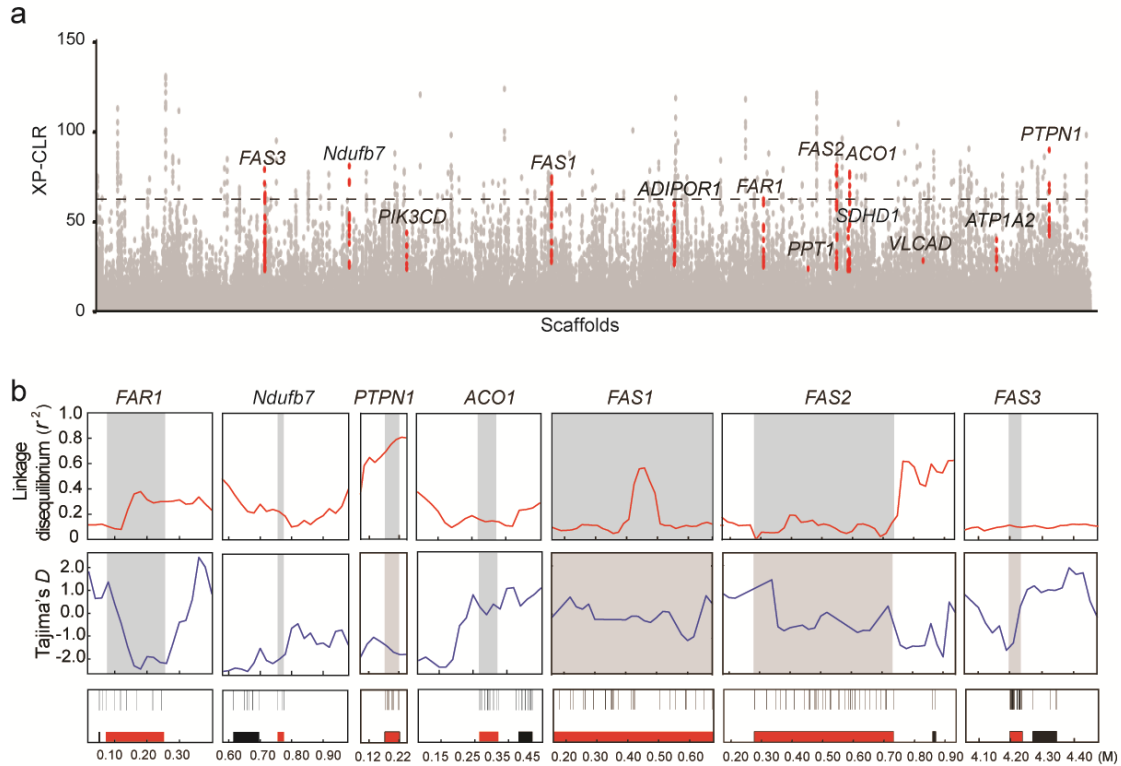

**Supplementary Figure 9.** Selective sweep signal of PSGs involved in energy metabolism. PSG, positively selected genes. (a) Genomic landscape of the XP-CLR values. All the scaffolds were arranged end to end in random order, as shown on the x-axis. Each point represents a 100-kb sliding window. Red colored points indicate gene regions. The region above the dashed line is top 0.5% XP-CLR statistics. (b) Tajima's  $D$  and average LD values of Tibetan locusts' genome. Data are plotted using a 40-kb sliding window in a scaffold. The red regions at bottom are the gene regions of the PSGs.

a

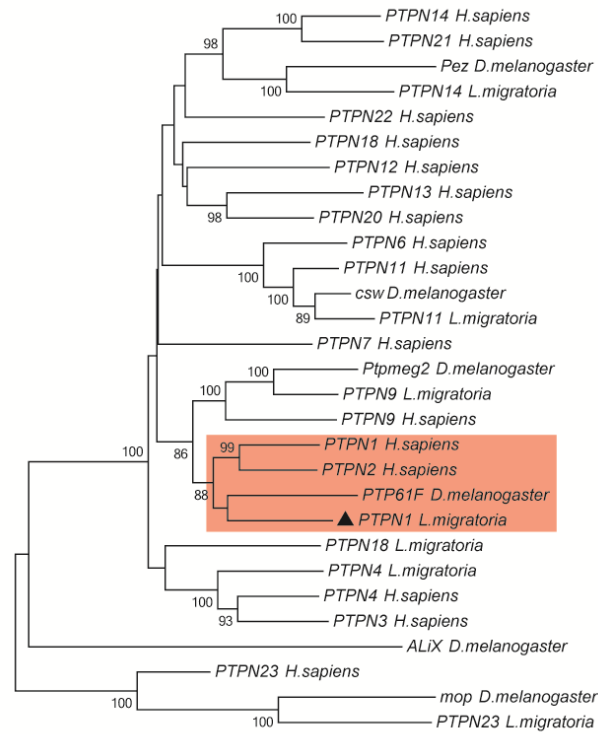

b

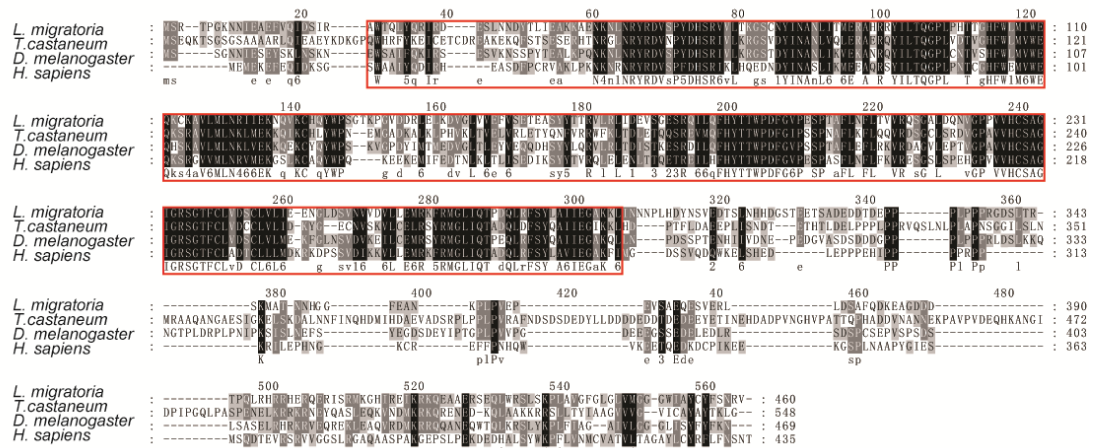

**Supplementary Figure 10.** Phylogenetic tree analysis and sequence alignment of PTP1B. (a) Phylogenetic tree construction of PTP1B. MEGA 5.0 was used for phylogenetic tree analysis with the corresponding amino acid sequences of non-transmembrane PTP family genes from *Homo sapiens*, *Drosophila melanogaster* and *Locusta migratoria*. One thousand bootstraps were performed. Only bootstrap values >85 are shown. (b) Amino acid alignment of the PTP1B in different species. The alignment among *L. migratoria*, *Tribolium castaneum*, *D. melanogaster* and *H. sapiens* was performed using MEGA 5.0 and GENEDOC. The region in red box represents PTP domain.

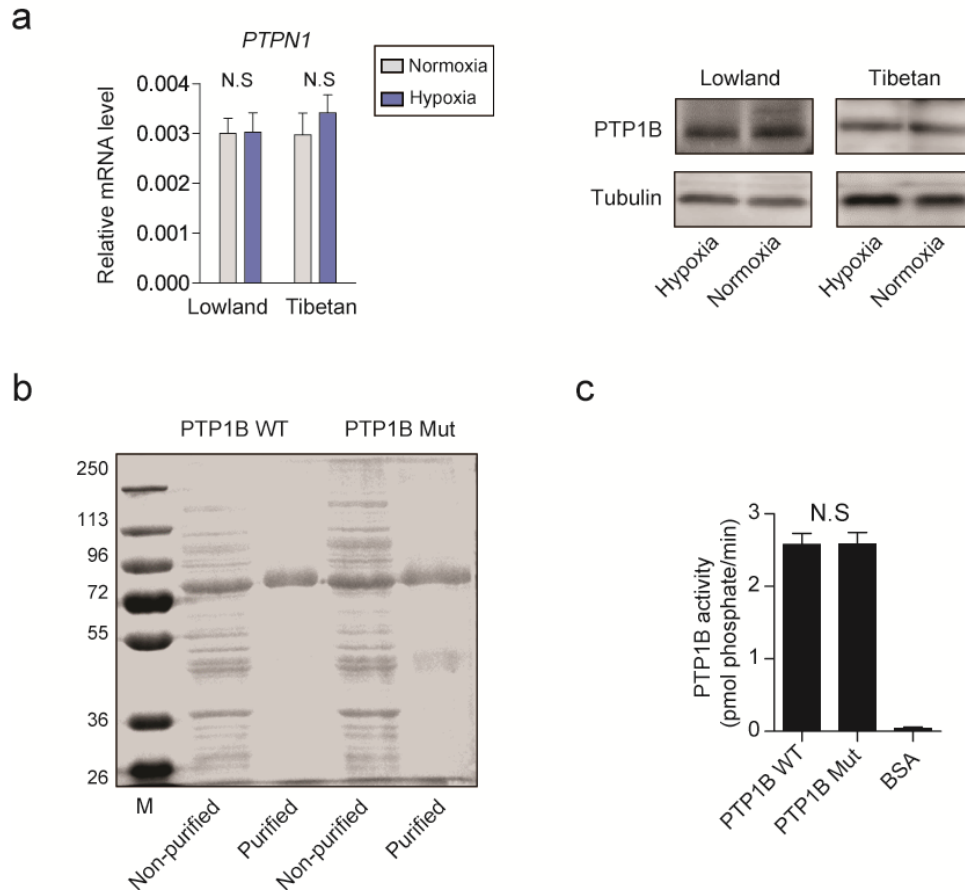

**Supplementary Figure 11.** Protein level detection and enzyme activity assay of locust PTP1B. (a) Quantitative real-time PCR and western blot detecting the mRNA and protein level of *PTPN1* in the Tibetan and lowland locusts in vivo. Supplementary Figs. 15a and 15b show the original images. (b) Expression and purification of locust PTP1B recombinant protein in S2 cells. (c) The enzyme activity of the recombinant locust PTP1B under normoxic condition, Bovine serum albumin (BSA) is used as negative control. WT represents wild-type PTP1B, whereas Mut represents mutant-type PTP1B. N.S represents no significant difference. The values are expressed as mean  $\pm$  s.e.m ( $n = 3$  replicates). Supplementary Fig. 15c shows the original image.

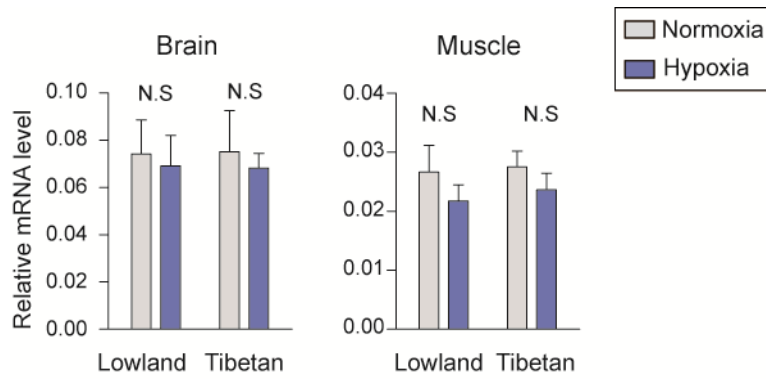

**Supplementary Figure 12.** mRNA levels of locust insulin like peptides in brain and thoracic muscle after hypoxia induction. The mRNA level was normalized against that of the internal control *rp49*. The values are expressed as mean  $\pm$  s.e.m. N.S. represents no significant difference compared with normoxia ( $n = 5$  replicates).

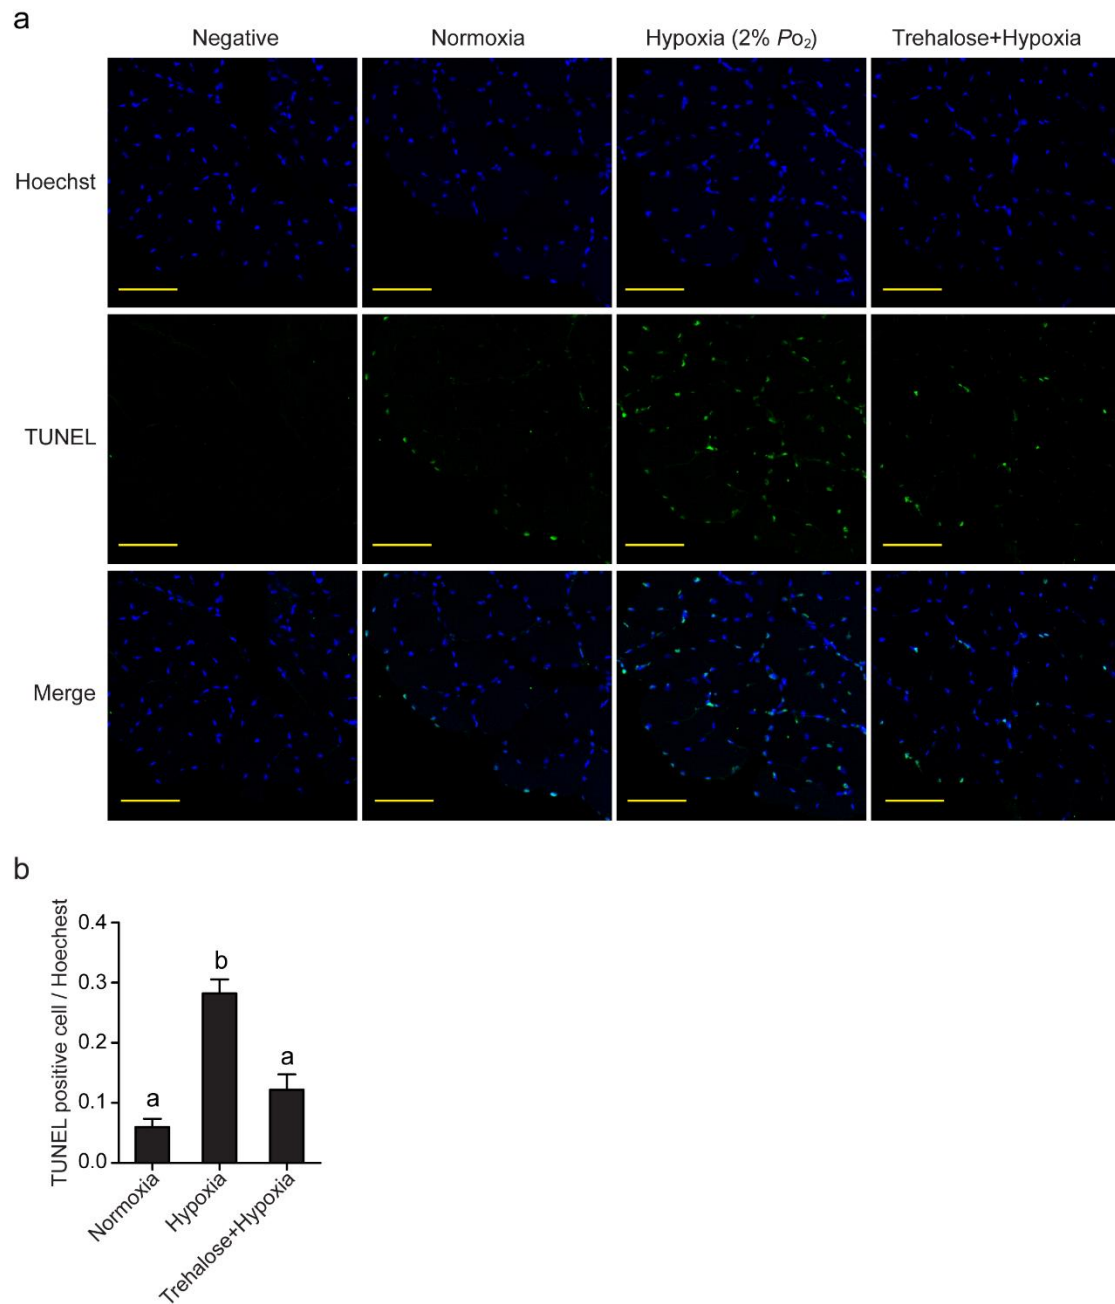

**Supplementary Figure 13.** In situ cell death detection assay. The cell death level of myocyte was tested by an in situ cell death detection kit. Cell nuclei were stained in blue using Hoechst. DNA fragments in dead cell nuclei were stained in green using TUNEL. Locust adult was injected with 100  $\mu\text{g}/\mu\text{l}$  trehalose solution in trehalose treatment. Normoxia represents 21%  $P_{O_2}$ . Hypoxia represents exposure to 2%  $P_{O_2}$  for 6h. Bar length = 50  $\mu\text{m}$ . (b) Percentage of dead cells represented as the TUNEL/ Hoechst ratio. The values are expressed as mean  $\pm$  s.e.m. Significant differences are denoted by different letters (one-way ANOVA,  $P < 0.05$ ) ( $n = 5$  replicates).

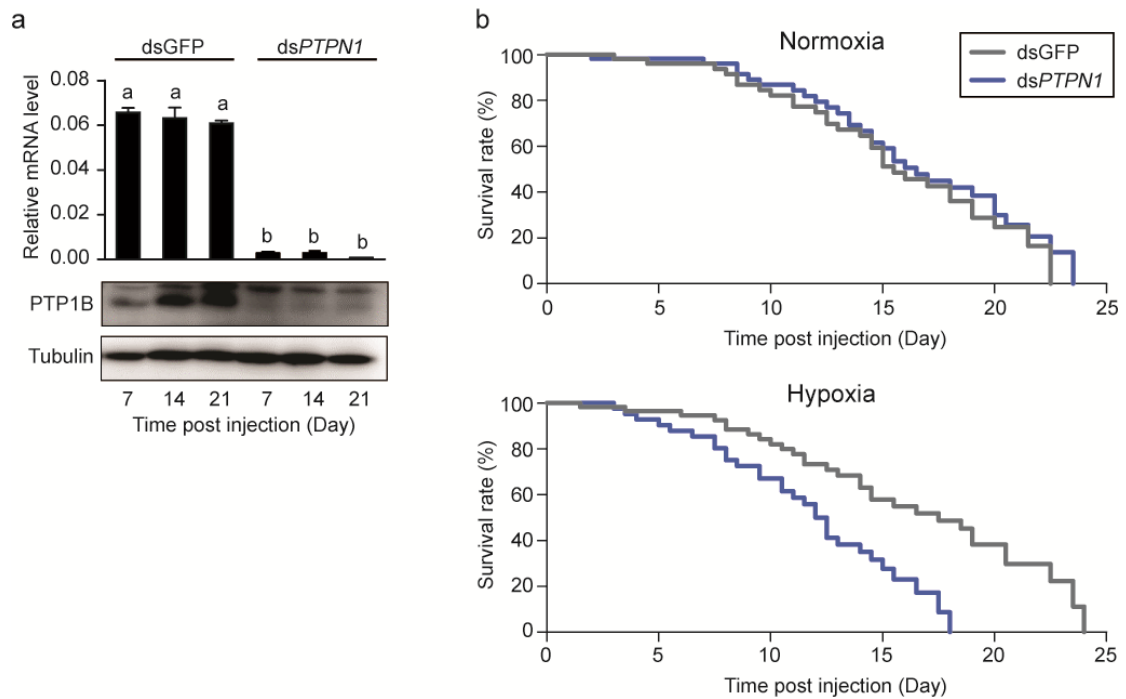

**Supplementary Figure 14.** Effects of *PTPNI* knockdown on adult lifespan. (a) RNAi efficiency in *PTPNI* expression knockdown. The mRNA and protein expression level of *PTPNI* in thoracic muscle was measured by quantitative real-time PCR and western blot, respectively. Double strand RNA (dsRNA) was injected to knock down expression. dsGFP was used as control. The values are expressed as mean  $\pm$  s.e.m. Significant differences are denoted by different letters (one-way ANOVA,  $P < 0.05$ ). Supplementary Fig. 151 shows the original image. (b) Effect of *PTPNI* knock-down on survivorship curves of locust adult under normoxia and hypoxia condition. Survival was recorded from 5-d-old adults when first dsRNA was injected. Wilcoxon rank sum test was used to test the significance of difference.  $n = 30$ . All assays were repeated twice with similar results.

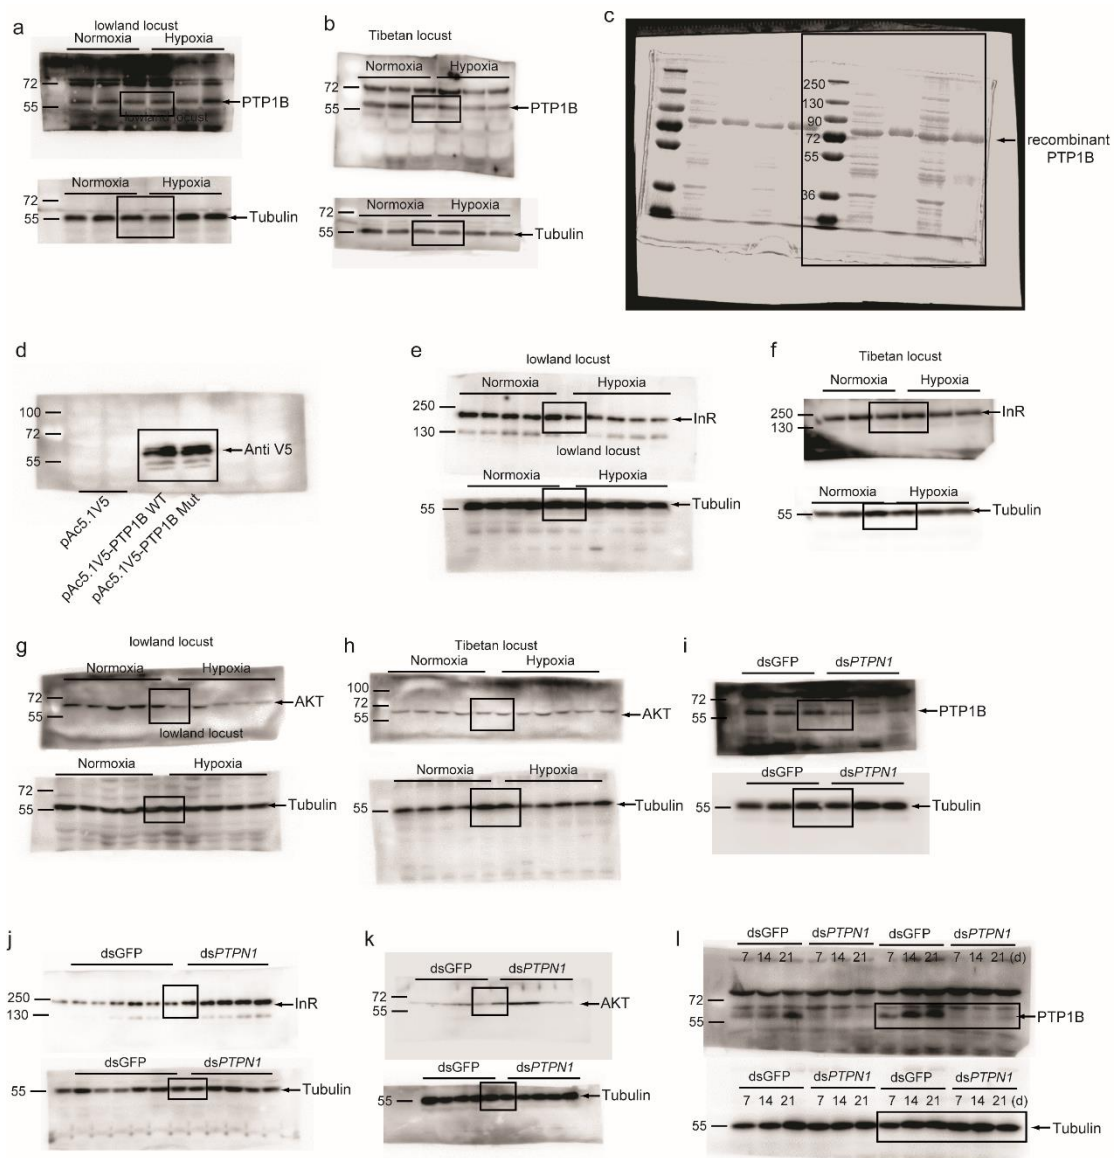

**Supplementary Figure 15.** The full-size western blot and SDS-PAGE scan.
